# Supplementary material
Source: PubMed Central journal article supplement (PMC8998879)
Supplement: NIHMS1788928-supplement-Supplemental_Figures.pdf [file NIHMS1788928-supplement-Supplemental_Figures.pdf]

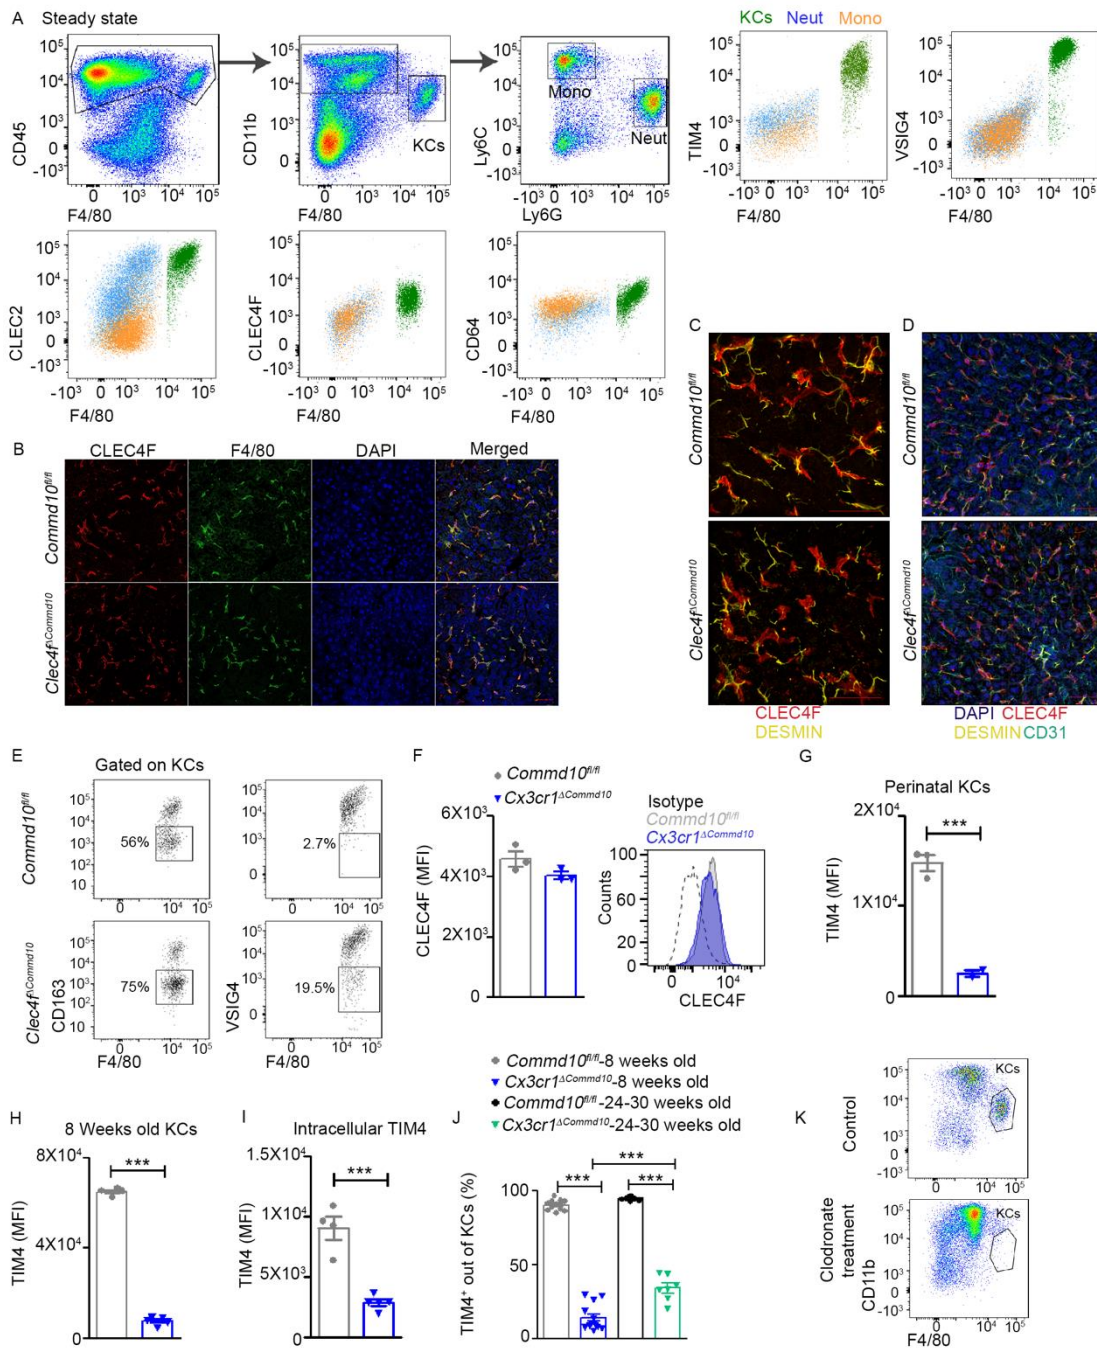

**Figure S1: *Clec4f<sup>ΔComm10</sup>* KCs fit into the KC niche, but are being replaced by MoKCs; related to Figure 1.** (A) Representative flow cytometry images displaying gating strategy used to define KCs and infiltrating Ly6C<sup>hi</sup> monocytes and neutrophils in the healthy liver. (B-D) Representative confocal microscopy images obtained from liver sections of *Comm10<sup>fl/fl</sup>* and *Clec4f<sup>ΔComm10</sup>*. (B) Expression of Clec4F (red), F4/80 (green) and nuclei (blue), original magnification:  $\times 20$ . Bars= 100 $\mu$ m. (C) Expression of Clec4F (red) and desmin (yellow), original magnification:  $\times 40$ . Bars=200  $\mu$ m. (D) Expression of Clec4F (red) and desmin (yellow), CD31 (cyan) and nuclei (blue). Original magnification:  $\times 20$ . Bars= 100 $\mu$ m. (E) Representative flow cytometry plots displaying the representation of CD163<sup>-</sup> and VSIG4<sup>-</sup> among *Comm10<sup>fl/fl</sup>* and *Clec4f<sup>ΔComm10</sup>* KCs. (F) Left, mean fluorescence intensity (MFI) of CLEC4F. Right, representative histogram plot showing expression of CLEC4F on *Comm10<sup>fl/fl</sup>* and *Cx3cr1<sup>ΔComm10</sup>* KCs, in comparison to isotype control (dashed black line) (n=3). (G-I) mean fluorescence intensity (MFI) of TIM4 expression in KCs from (G) perinatal mice, (H), eight weeks old mice, and (I) intracellular staining of TIM4 in KCs. (G-I: n $\geq$ 3) (J) Frequency of TIM4<sup>+</sup> cells among KCs from eight and 24-30 weeks old *Comm10<sup>fl/fl</sup>* and *Cx3cr1<sup>ΔComm10</sup>* mice (n>5). (K) Representative flow cytometry plots showing depletion of KC following clodronate liposome treatment. Data were analyzed by unpaired, two-tailed *t*-test and are presented as mean  $\pm$  SEM with significance: \*\*\**p* < 0.001. Experiments were repeated at least 3 times (A-F), twice (H, J) or once (G, I, K).

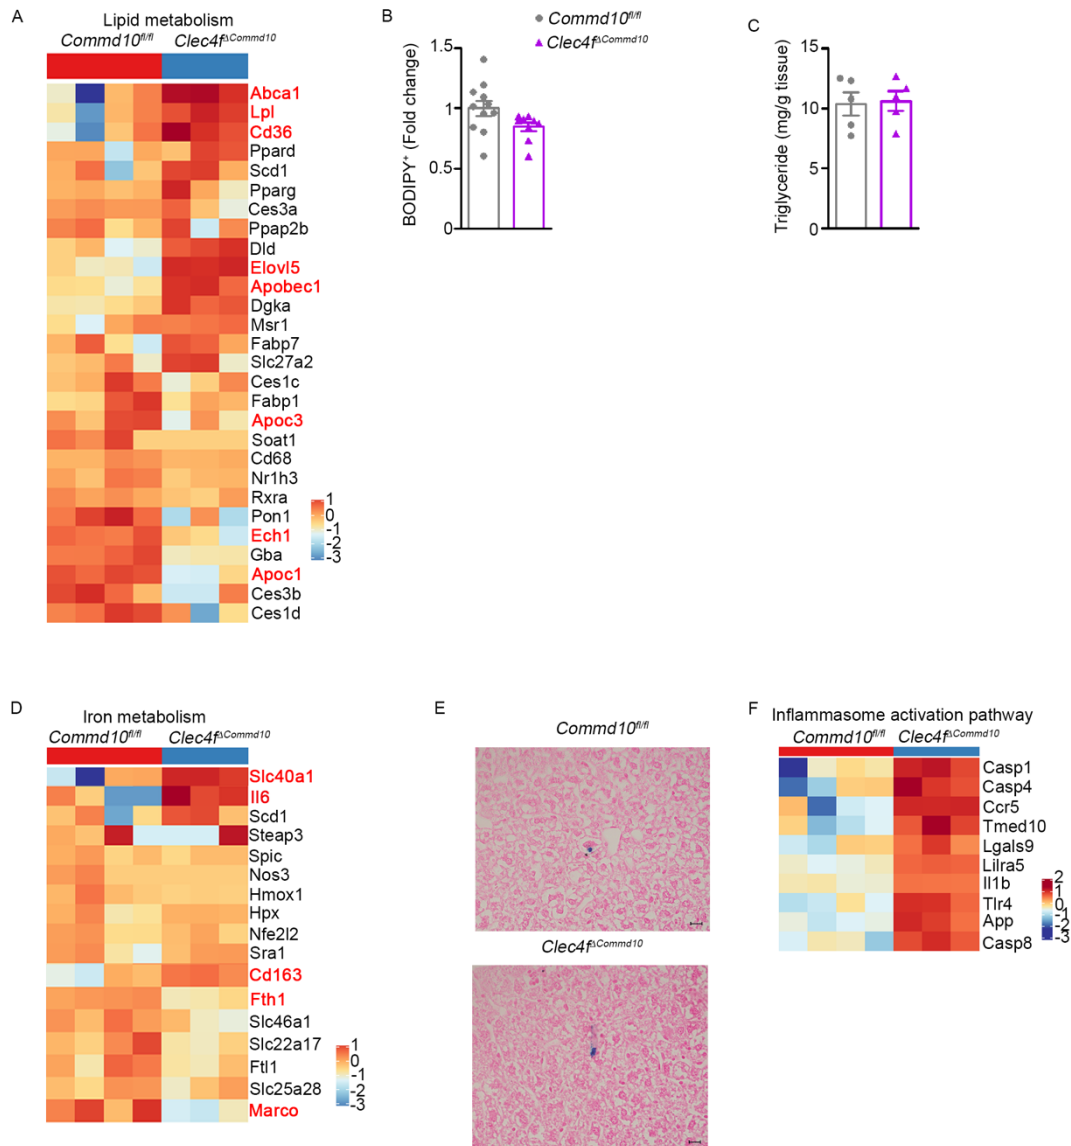

**Figure S2: COMMD10-deficient KCs acquire liver-specific functional KC identity; related to Figure 2.**

(A) MARS-RNAseq heat map analysis displaying expression of genes associated with lipid metabolism in *Commmd10<sup>fl/fl</sup>* versus *Clec4<sup>ΔCommmd10</sup>* KCs. (B) Neutral lipid content of *Commmd10<sup>fl/fl</sup>* and *Clec4<sup>ΔCommmd10</sup>* steady state KCs. Results shown are mean fluorescence intensity (MFI) for BODIPY staining (n>10). (C) Triglycerides levels normalized to liver tissue mass in *Commmd10<sup>fl/fl</sup>* and *Clec4<sup>ΔCommmd10</sup>* livers (n=5). (D) MARS-RNAseq heat map analysis displaying expression of genes associated with iron metabolism in *Commmd10<sup>fl/fl</sup>* versus *Clec4<sup>ΔCommmd10</sup>* KCs. (E) Representative images of Perl's iron, with Prussian blue reaction staining of *Commmd10<sup>fl/fl</sup>* and *Clec4<sup>ΔCommmd10</sup>* liver sections. Original magnification= x4. Bars=50μm. (F) MARS-RNAseq heat map analysis of *Commmd10<sup>fl/fl</sup>* versus *Clec4<sup>ΔCommmd10</sup>* KCs displaying variance of genes associated with inflammasome activation pathway. For A and D, significantly differentially expressed genes are marked red. Analysis was performed on differentially expressed genes (n>3,  $p < 0.05$ ; raw P values were adjusted for multiple testing using the procedure of Benjamini and Hochberg,  $\geq 1.5$ -fold change).

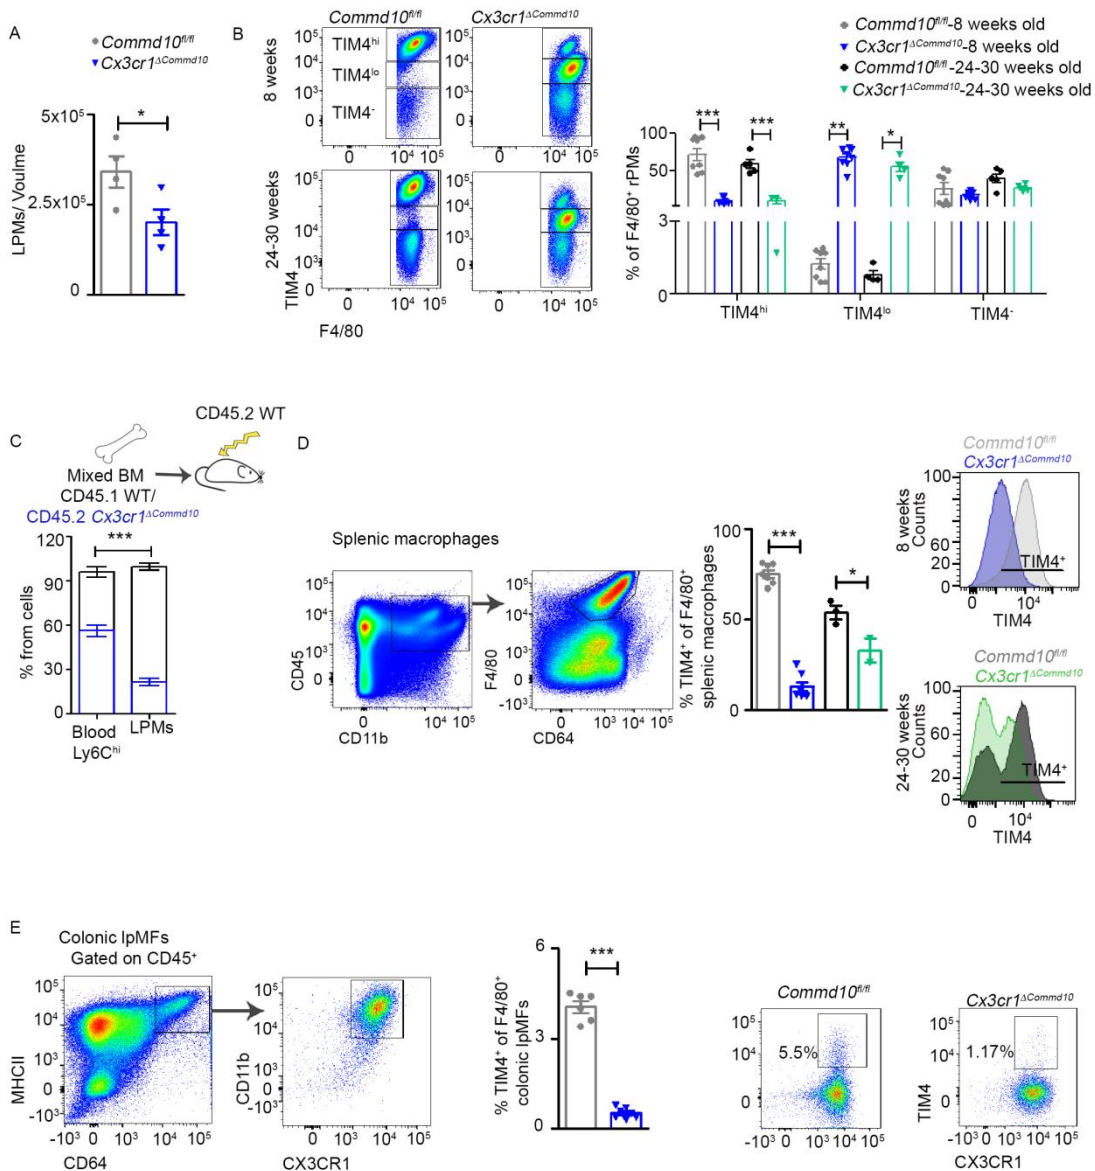

**Figure S3: COMMD10 is crucial for the homeostatic maintenance of resident macrophages of the peritoneum, spleen and gut; related to Figure 3.**

(A) LPMs counts normalized to extracted volume of peritoneal lavage in *Commd10<sup>fl/fl</sup>* and *Cx3cr1<sup>ΔCommd10</sup>* mice (n=4). (B) Quantification of TIM4<sup>+</sup>, TIM4<sup>lo</sup> and TIM4<sup>-</sup> LPMs frequency among total LPMs from *Commd10<sup>fl/fl</sup>* and *Cx3cr1<sup>ΔCommd10</sup>* mice (n≥4). (C) quantification of % chimerism in blood Ly6C<sup>hi</sup> monocytes and LPMs assessed in mixed CD45.1 WT/ CD45.2 *Cx3cr1<sup>ΔCommd10</sup>* BM chimeras at eight weeks post irradiation (n≥8). (D) Left, frequency of TIM4<sup>+</sup> among splenic macrophages in eight versus 24-30 weeks old *Commd10<sup>fl/fl</sup>* and *Cx3cr1<sup>ΔCommd10</sup>* mice. Right, representative histogram plot showing expression level of TIM4. (E) Left, frequency of TIM4<sup>+</sup> among colonic lamina propria macrophages (IpMFs) in eight weeks old *Commd10<sup>fl/fl</sup>* and *Cx3cr1<sup>ΔCommd10</sup>* mice. Right, representative flow cytometry plot showing expression level of TIM4 in IpMFs (24-30 weeks: n>2, eight weeks n=4). Data were analyzed by unpaired, two-tailed *t*-test and are presented as mean ± SEM with significance: \**p* < 0.05, \*\**p* < 0.01, \*\*\**p* < 0.001. Experiments were repeated twice (B, C, D, E) or once (A).

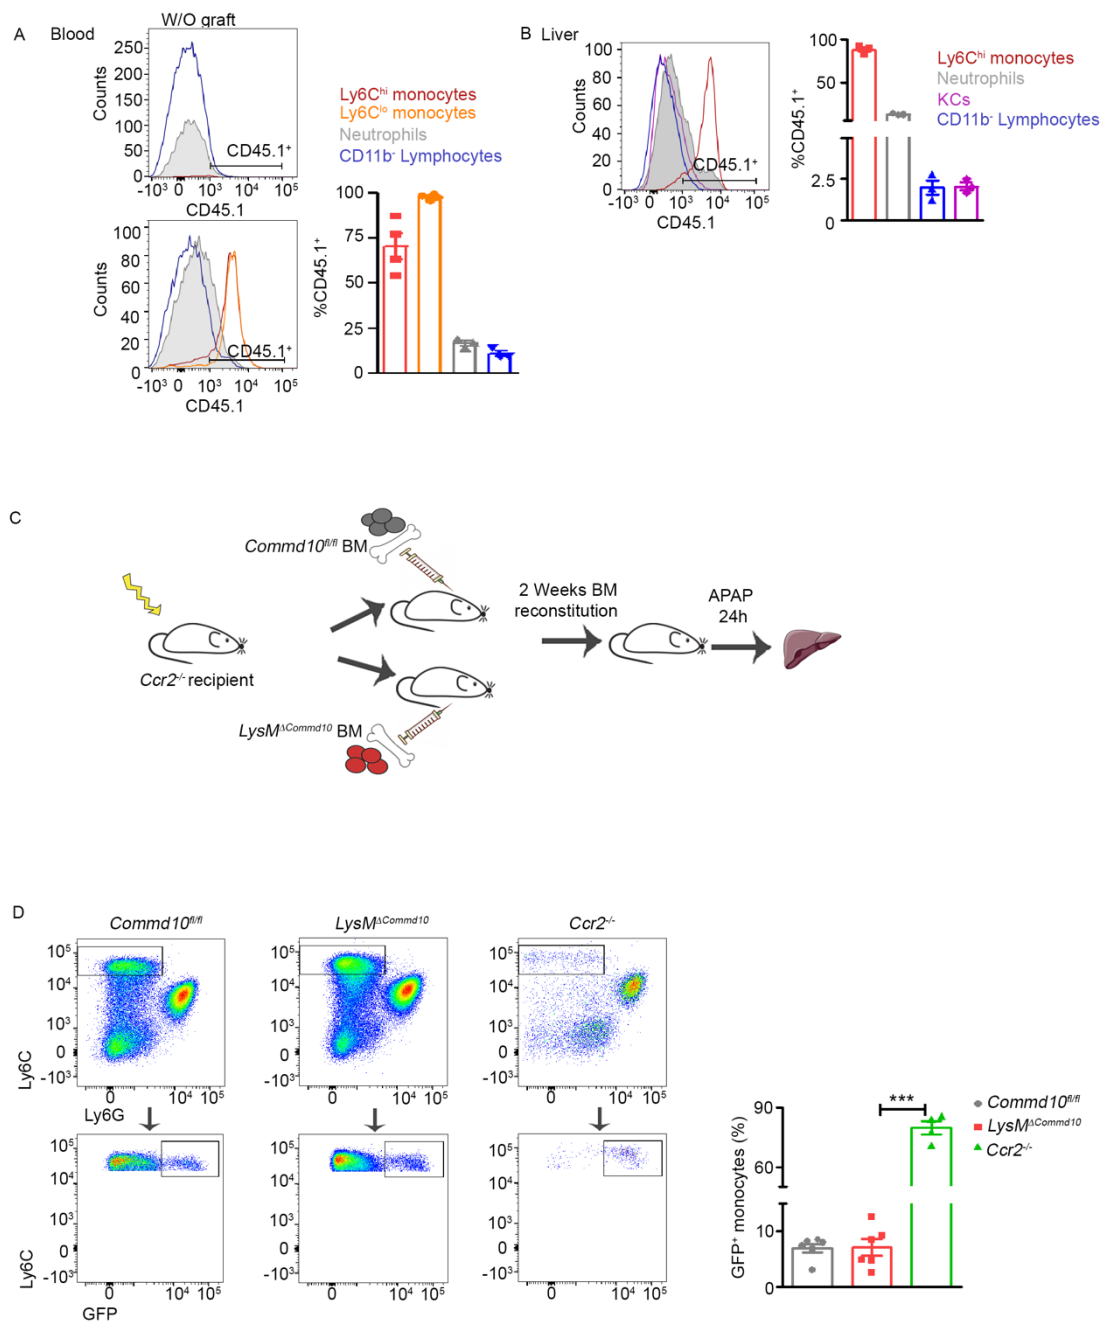

**Figure S4: COMMD10 is important for tuning the inflammatory activity of Ly6C<sup>hi</sup> monocytes in acetaminophen-induced liver injury (AILI); related to Figure 5.** Irradiated (3 Gy) *Cx3cr1<sup>gfp/+</sup>Ccr2<sup>-/-</sup>* mice were engrafted with CD45.1 congenic BM, allowed to reconstitute for two weeks, and then subjected to AILI 24 h (n>4). (A- B) Representative flow cytometry images illustrating the chimerism (% of CD45.1<sup>+</sup>) obtained in (A) blood and (B) liver in indicated immune cells. (C) Schematic illustration of the experimental design: irradiated (3 Gy) *Cx3cr1<sup>gfp/+</sup>Ccr2<sup>-/-</sup>* mice were engrafted with BM from *LysM<sup>ΔComm10</sup>* or *Comm10<sup>fl/fl</sup>* littermate mice. Two weeks post reconstitution, mice were subjected to AILI 24 h. (D) Representative flow cytometry images illustrating the chimerism obtained in liver Ly6C<sup>hi</sup> monocytes marked by their negative expression of CX3CR1-GFP reporter protein. Data were analyzed by unpaired, two-tailed t-test and are presented as mean ± SEM with significance: \*\*\*p< 0.001. Data are representative three independent experiments.

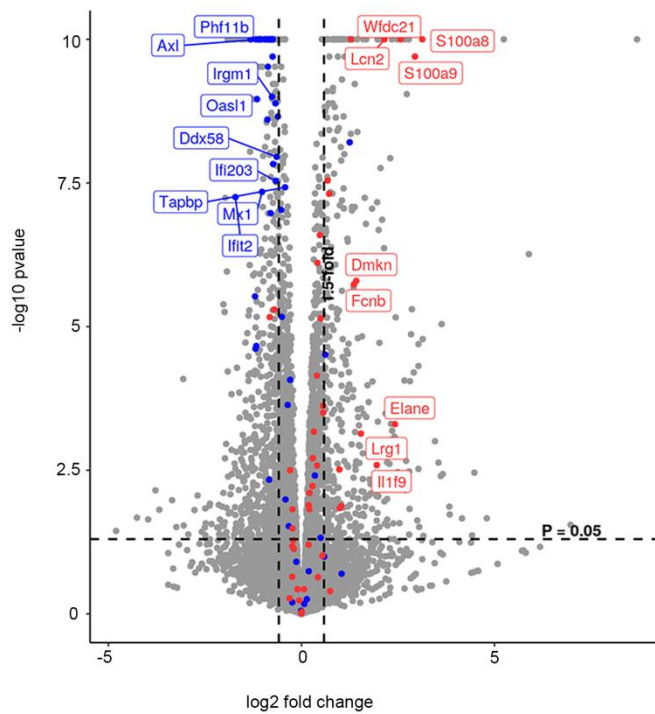

**Figure S5: COMMD10-deficient Ly6C<sup>hi</sup> monocytes display higher expression of ‘neutrophil-like’ monocyte (NeuMo) signature genes; related to Figure 6.** Volcano plots comparing *Commd10*<sup>fl/fl</sup> and *LysM*<sup>Cre</sup>*Commd10*<sup>fl/fl</sup> Ly6C<sup>hi</sup> monocytes, the expression pattern of both NeuMo and DCMo associated genes as depicted from (Weinreb et al., 2020). Analysis was performed on differentially expressed genes ( $n > 3$ ,  $p < 0.05$ ; raw P values were adjusted for multiple testing using the procedure of Benjamini and Hochberg,  $\geq 1.5$ -fold change).

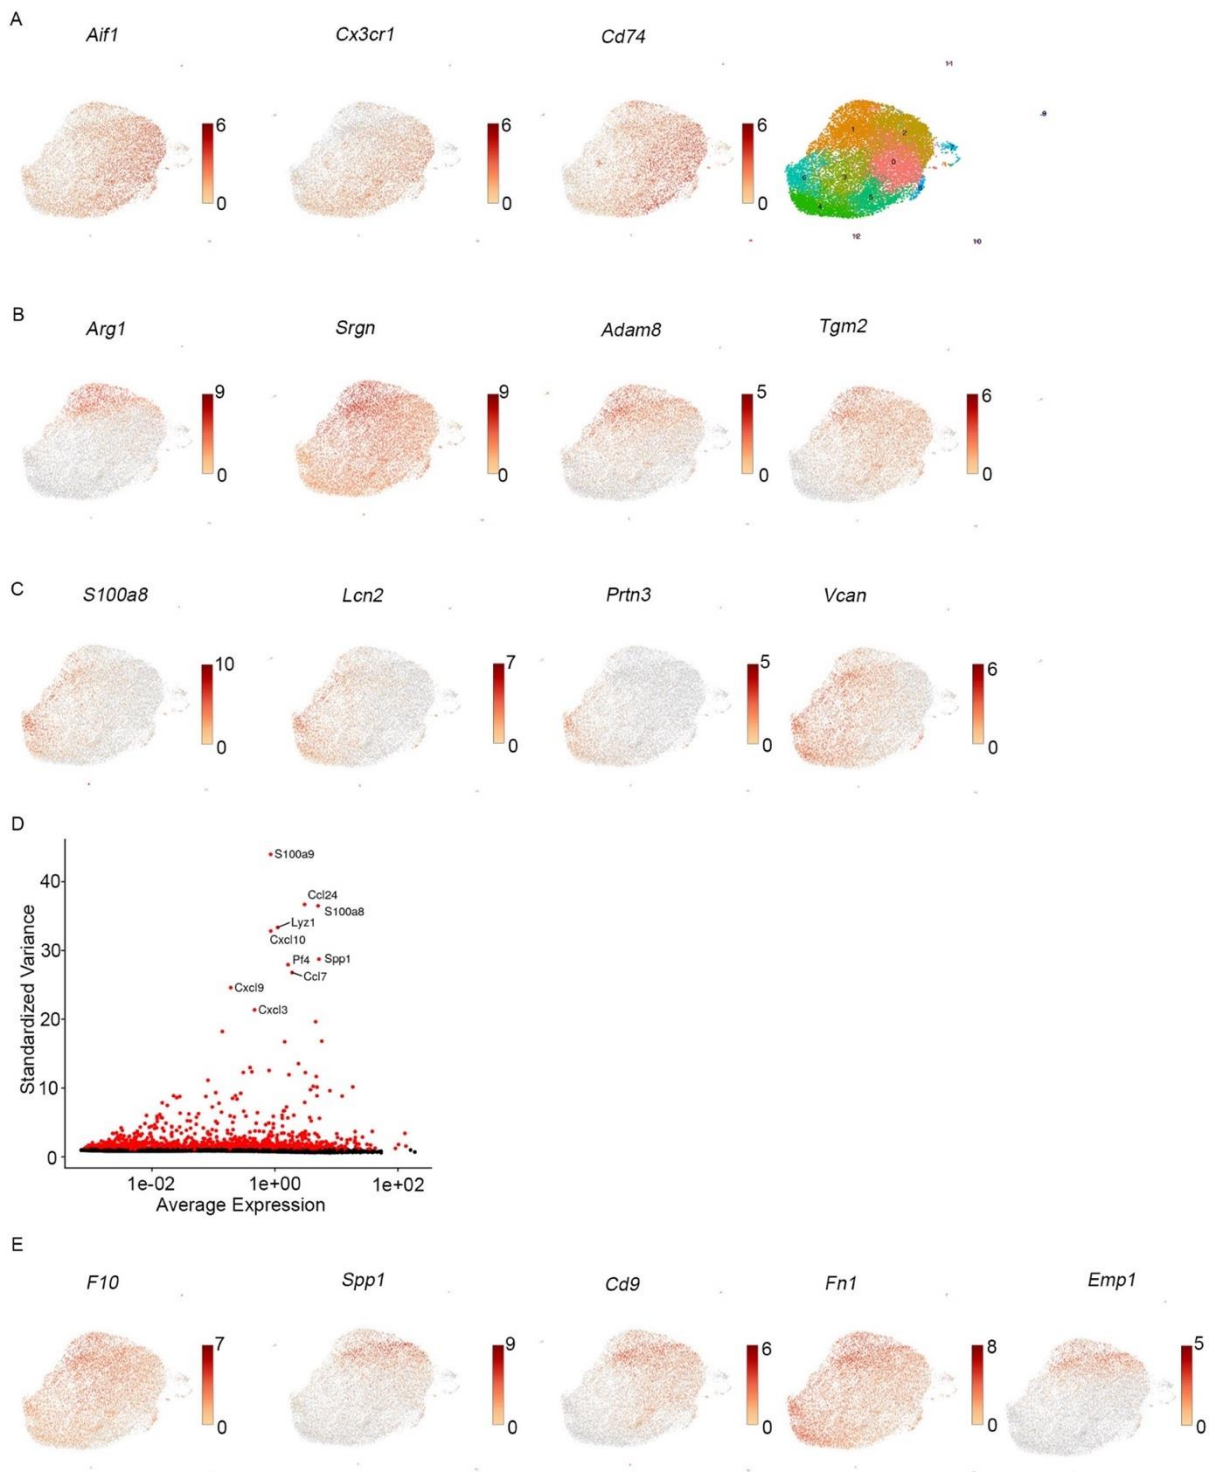

**Figure S6: COMMD10 deletion-induces a biased differentiation of  $Ly6C^{hi}$  monocytes toward ‘neutrophil-like’ monocytes (NeuMo) and lipid associated macrophages (LAMs); related to Figure 7.** Single cell RNA-seq analysis of liver  $Ly6C^{hi}$  monocytes at AILI 24 h. Gene expression domains of (A) cluster 0, (B) cluster 1, (C) NeoMo markers (D) and (E) LAM markers. Analysis was performed on differentially expressed genes ( $p < 0.05$ ; non-parametric Wilcoxon rank sum test,  $\geq 1.5$ -fold change).

| <b>REAGENT or RESOURCE</b>               | <b>SOURCE</b> | <b>IDENTIFIER</b> |
|------------------------------------------|---------------|-------------------|
| <i>Tnfa</i> FWD:GGTGCCTATGTCTCAGCCTCTT   | Merck         | N/A               |
| <i>Tnfa</i> REV:GCCATAGAAGCTGATGAGAGGGAG | Merck         | N/A               |
| <i>Il-1b</i> FWD:TGGACCTTCCAGGATGAGGACA  | Merck         | N/A               |
| <i>Il-1b</i> REV: GTTCATCTCGGAGCCTGTAGTG | Merck         | N/A               |
| <i>Cxcl1</i> FWD:TCCAGAGCTTGAAGGTGTTGCC  | Merck         | N/A               |
| <i>Cxcl1</i> REV:AACCAAGGGAGCTTCAGGGTCA  | Merck         | N/A               |
| <i>Cxcl2</i> FWD: CATCCAGAGCTTGAGTGTGACG | Merck         | N/A               |
| <i>Cxcl2</i> REV: GGCTTCAGGGTCAAGGCAAAGT | Merck         | N/A               |
| <i>Timd4</i> FWD: CTACAGACAAGCCGTAAGTCA  | Merck         | N/A               |
| <i>Timd4</i> REV: GTCTTCATCATCCCTCCC     | Merck         | N/A               |
| <i>Ccl1</i> FWD: GCTACAAGAGGATCACCAGCAG  | Merck         | N/A               |
| <i>Ccl2</i> REV: GTCTGGACCCATTCCTTCTTGG  | Merck         | N/A               |
| <i>Gata6</i> FWD:ATGCGGTCTACAGCAAGATGA   | Merck         | N/A               |
| <i>Gata6</i> REV: CGCCATAAGGTAGTGGTTGTGG | Merck         | N/A               |

**Figure S7: List of oligonucleotide sequences used for qRT-PCR; Related to Figure 1F, Figure 3B, Figure 4F, Figure 5E.**
